# Supplementary material for: Effect of the Promoting Resilience in Stress Management Intervention for Parents of Children With Cancer (PRISM-P): A Randomized Clinical Trial
Source: PubMed Central journal article supplement (PMC6751761; doi:10.1001/jamanetworkopen.2019.11578), 2019-09-18
Supplement: jamanetwopen-2-e1911578-s002.pdf [file jamanetwopen-2-e1911578-s002.pdf]

## Supplementary Online Content

Rosenberg AR, Bradford MC, Junkins CC, et al. Effect of the Promoting Resilience in Stress Management intervention for parents of children with cancer (PRISM-P): a randomized clinical trial. *JAMA Netw Open*. 2019;2(9):e1911578. doi:10.1001/jamanetworkopen.2019.11578

**eTable 1.** PRISM Intervention Content Details

**eTable 2.** Demographic Characteristics of Participants Who Did and Did Not Complete 3 Month Surveys

**eTable 3.** Baseline Scores (Mean, SD) of Participants Who Did and Did Not Complete 3 Month Surveys

This supplementary material has been provided by the authors to give readers additional information about their work.

**eTable 1.** PRISM Intervention Content Details

| <b>Topic</b>            | <b>Skills</b>                                                                                                                           | <b>1:1 Delivery</b>                                                                                                                                        | <b>Group Delivery</b>                                                                                                                                                                                      |
|-------------------------|-----------------------------------------------------------------------------------------------------------------------------------------|------------------------------------------------------------------------------------------------------------------------------------------------------------|------------------------------------------------------------------------------------------------------------------------------------------------------------------------------------------------------------|
| Stress-management       | Relaxation (deep breathing), Mindfulness (mediation), Identifying Social and Other Resources                                            | In person or skype/phone, 30-60 minutes per session, approximately every 2-3 weeks, scheduled in tandem with planned hospital admissions or clinic visits. | In person (skype/phone available on individual request), half-day duration for all four sessions, scheduled approximately every other month based on participant availability. Goal 2-5 parents per group. |
| Goal-setting            | Setting specific, measurable, actionable, realistic, time-dependent (“SMART”) goals, planning for pitfalls and identifying alternatives |                                                                                                                                                            |                                                                                                                                                                                                            |
| Cognitive restructuring | Recognizing negative self-talk, replacing it with positive, neutral, or realistic perspectives                                          |                                                                                                                                                            |                                                                                                                                                                                                            |
| Benefit-finding         | Identifying gratitude, lessons, purpose, or meaning derived from experience of child’s illness                                          |                                                                                                                                                            |                                                                                                                                                                                                            |
| Boosters                | Check-ins from staff inviting participants to practice skills-of-choice and/or share applied skills, accomplishments, and challenges.   | In person/phone, once monthly                                                                                                                              | By email to whole group, once monthly                                                                                                                                                                      |

**eTable 2.** Demographic Characteristics of Participants Who Did and Did Not Complete 3 Month Surveys

|                                                            | Completed 3 month surveys<br>(N=77) | Did not complete 3 month<br>surveys (N=17) |
|------------------------------------------------------------|-------------------------------------|--------------------------------------------|
| Study arm, n (%)                                           |                                     |                                            |
| UC                                                         | 29 (38)                             | 1 (6)                                      |
| 1:1                                                        | 26 (34)                             | 6 (35)                                     |
| Group                                                      | 22 (29)                             | 10 (59)                                    |
| Age in years, median (IQR)                                 | 37 (32, 42)                         | 35 (32, 39)                                |
| Relationship to patient, n (%)                             |                                     |                                            |
| Mother                                                     | 59 (77)                             | 14 (82)                                    |
| Father                                                     | 17 (22)                             | 3 (18)                                     |
| Other (Adoptive Grandmother)                               | 1 (1)                               | 0 (0)                                      |
| Race categories, n (%)                                     |                                     |                                            |
| White                                                      | 52 (68)                             | 11 (65)                                    |
| Asian                                                      | 11 (14)                             | 1 (6)                                      |
| Black or African American                                  | 0 (0)                               | 2 (12)                                     |
| American Indian or Alaskan Native                          | 3 (4)                               | 0 (0)                                      |
| Native Hawaiian or other Pacific Islander                  | 5 (6)                               | 0 (0)                                      |
| Mixed/Other                                                | 5 (6)                               | 3 (18)                                     |
| No answer                                                  | 1 (1)                               | 0 (0)                                      |
| Hispanic or Latino ethnicity, n (%)                        | 4 (5)                               | 2 (12)                                     |
| First language English, n (%)                              | 71 (92)                             | 16 (94)                                    |
| Highest Education, n (%)                                   |                                     |                                            |
| Less than high school                                      | 2 (3)                               | 2 (12)                                     |
| High School                                                | 18 (23)                             | 5 (29)                                     |
| College/Trade School                                       | 39 (51)                             | 9 (53)                                     |
| Graduate School                                            | 14 (18)                             | 1 (6)                                      |
| Other                                                      | 4 (5)                               | 0 (0)                                      |
| Total combined family income for the past 12 months, n (%) |                                     |                                            |
| Less than \$25,000                                         | 10 (13)                             | 6 (35)                                     |
| \$25,000 through \$ 49,999                                 | 7 (9)                               | 2 (12)                                     |
| \$50,000 through \$ 99,000                                 | 26 (34)                             | 4 (24)                                     |
| \$100,000 and greater                                      | 30 (39)                             | 3 (18)                                     |
| Don't know / prefer not to answer                          | 4 (5)                               | 2 (12)                                     |
| Partner Status, n (%)                                      |                                     |                                            |
| Married                                                    | 58 (75)                             | 9 (53)                                     |
| Not married, living with partner                           | 6 (8)                               | 1 (6)                                      |
| No partner, never married                                  | 6 (8)                               | 3 (18)                                     |
| Divorced, separated, widowed                               | 7 (9)                               | 4 (24)                                     |
| Cancer-type, n (%)                                         |                                     |                                            |
| Leukemia/Lymphoma                                          | 45 (58)                             | 6 (35)                                     |
| Central Nervous System (CNS) tumor                         | 20 (26)                             | 8 (47)                                     |
| Non-CNS solid tumor                                        | 12 (16)                             | 3 (18)                                     |

**eTable 3.** Baseline Scores (Mean, SD) of Participants Who Did and Did Not Complete 3 Month Surveys

| Parent-Reported Outcome Measure       | Completed 3 month surveys (N=77) | Did not complete 3 month surveys (N=17) |
|---------------------------------------|----------------------------------|-----------------------------------------|
| Resilience                            | 28.8 (5.9)                       | 26.5 (5.4)                              |
| Benefit Finding                       | 51.5 (6.4)                       | 47.9 (6.9)                              |
| Hope                                  | 3.5 (0.9)                        | 3.2 (0.7)                               |
| Social Support                        | 4.2 (0.8)                        | 3.7 (1.1)                               |
| Physical functioning                  | 91.8 (18.4)                      | 77.5 (24.2)                             |
| Limitations due to physical health    | 72.3 (40.8)                      | 56.3 (43.3)                             |
| Limitations due to emotional problems | 52.2 (43.0)                      | 52.9 (42.6)                             |
| Energy/fatigue                        | 38.0 (20.9)                      | 31.6 (17.0)                             |
| Emotional well-being                  | 56.9 (19.1)                      | 56.5 (16.8)                             |
| Social functioning                    | 59.9 (29.0)                      | 50.0 (26.5)                             |
| Pain                                  | 80.4 (18.9)                      | 66.2 (30.5)                             |
| General health                        | 66.3 (19.2)                      | 59.1 (13.9)                             |
| Perceived Stress                      | 21.7 (5.8)                       | 23.2 (5.5)                              |
| Distress                              | 8.9 (4.5)                        | 8.8 (4.1)                               |
