# Supplementary material for: Effect of the Promoting Resilience in Stress Management Intervention for Parents of Children With Cancer (PRISM-P): A Randomized Clinical Trial
Source: PubMed Central journal article supplement (PMC6751761; doi:10.1001/jamanetworkopen.2019.11578), 2019-09-18
Supplement: jamanetwopen-2-e1911578-s003.pdf [file jamanetwopen-2-e1911578-s003.pdf]

## Data Sharing Statement

Rosenberg. Effect of the Promoting Resilience in Stress Management Intervention for Parents of Children With Cancer (PRISM-P). *JAMA Netw Open*. Published September 18, 2019.  
10.1001/jamanetworkopen.2019.11578

### Data

**Data available:** No

### Additional Information

**Explanation for why data not available:** These data include protected information about the children of participants and thus will be kept confidential.
